# Supplementary material for: Common and Mutation Specific Phenotypes of KRAS and BRAF Mutations in Colorectal Cancer Cells Revealed by Integrative-Omics Analysis
Source: Research Square preprint supplement (doi:10.21203/rs.3.rs-397255/v1), 2021-04-26
Supplement: Supplementary file 1 [file d96f93c0625cb833e69643db.xlsx]

## Sheet: G12C_V600E
Supplementary table 10A. Differentially expresed genes from significantly regulated metabolic pathways between RKO KRAS G12C and BRAF V600E.
Pathway	Gene Name	LogFC
Arginine and Proline Metabolism	GOT1	-1.91654
Beta-Alanine metabolism	ALDH1A3	4.71487
Beta-Alanine metabolism	AOC3	2.77404
Beta-Alanine metabolism	AOC2	1.92309
Butanoate metabolism	EHHADH	1.45213
Caffeine metabolism	NAT1	1.81638
Fatty Acid Metabolism	CHAC1	-2.30604
Galactose metabolism	ENPP1	-2.51493
Galactose metabolism	PGM2L1	2.30844
Glutathione Metabolism	CHAC1	-2.30604
Glycerophospholipid metabolism	AGPAT4	1.02295
Glycerophospholipid metabolism	LPCAT2	5.97771
Glycerophospholipid metabolism	LPCAT4	1.28188
Glycolysis and Gluconeogenesis	LPCAT2	5.97771
Glycolysis and Gluconeogenesis	AGPAT4	1.02295
Glycolysis and Gluconeogenesis	LPCAT4	1.28188
Glycosphingolipid biosynthesis - globoseries	PDE4B	-5.70377
Glycosphingolipid biosynthesis - globoseries	ADSL	-1.01263
Glycosphingolipid biosynthesis - globoseries	PDE3A	5.90443
Glycosphingolipid biosynthesis - globoseries	PDE4D	-2.35805
Glycosphingolipid biosynthesis - globoseries	AK7	2.88098
Glycosphingolipid biosynthesis - globoseries	AMPD3	2.9743
Glycosphingolipid biosynthesis - globoseries	AK8	2.63996
Glycosphingolipid biosynthesis - globoseries	PDE10A	6.06181
Glycosphingolipid biosynthesis - globoseries	ENPP1	-2.51493
Glycosphingolipid biosynthesis - globoseries	NT5E	6.23555
Glycosphingolipid biosynthesis - globoseries	NT5C2	-1.38562
Glycosphingolipid biosynthesis - neolactoseries	GOT1	-1.91654
Histidine metabolism	ALDH1A3	4.71487
Lysine metabolism	MAN1A1	1.76304
N-Glycan biosynthesis	MGAT4B	1.12608
N-Glycan biosynthesis	MAN1A1	1.76304
N-Glycan biosynthesis	ALG14	-1.29265
Propanoate metabolism	UPP1	1.29065
Propanoate metabolism	TYMP	1.79333
Propanoate metabolism	ENPP1	-2.51493
Propanoate metabolism	NT5E	6.23555
Propanoate metabolism	ACACB	-1.08348
Propanoate metabolism	EHHADH	1.45213
Propanoate metabolism	NT5C2	-1.38562
Propanoate metabolism	ACSS1	6.36278
Proteoglycan biosynthesis	LDHD	-1.13522
Proteoglycan biosynthesis	ACACB	-1.08348
Proteoglycan biosynthesis	ACSS1	6.36278
Purine metabolism	PDE4B	-5.70377
Purine metabolism	ADSL	-1.01263
Purine metabolism	PDE4D	-2.35805
Purine metabolism	ENPP1	-2.51493
Purine metabolism	NT5E	6.23555
Purine metabolism	AK8	2.63996
Purine metabolism	AMPD3	2.9743
Purine metabolism	NT5C2	-1.38562
Purine metabolism	PDE3A	5.90443
Purine metabolism	AK7	2.88098
Purine metabolism	PDE10A	6.06181
Pyrimidine metabolism	UPP1	1.29065
Pyrimidine metabolism	TYMP	1.79333
Pyrimidine metabolism	ENPP1	-2.51493
Pyrimidine metabolism	NT5E	6.23555
Pyrimidine metabolism	NT5C2	-1.38562
Pyruvate Metabolism	LDHD	-1.13522
Pyruvate Metabolism	ACACB	-1.08348
Pyruvate Metabolism	ACSS1	6.36278
Starch and Sucrose Metabolism	ENPP1	-2.51493
Tyrosine metabolism	GOT1	-1.91654
Tyrosine metabolism	ALDH1A3	4.71487
Urea cycle/amino group metabolism	GOT1	-1.91654
Valine, leucine and isoleucine degradation	TKFC	-1.1898
Valine, leucine and isoleucine degradation	HIBADH	-1.28792
Valine, leucine and isoleucine degradation	EHHADH	1.45213
Vitamin B1 (thiamin) metabolism	ACACB	-1.08348
Vitamin B1 (thiamin) metabolism	ACSS1	6.36278

## Sheet: G12C_WT
Supplementary table 10B. Differentially expresed genes from significantly regulated metabolic pathways between RKO KRAS G12C and BRAF WT.
Pathway	Gene Name	LogFC
Arachidonic acid metabolism	NT5M	1.94938
Arachidonic acid metabolism	RRM2	-1.10091
Arachidonic acid metabolism	NT5E	1.36691
Beta-Alanine metabolism	AOC3	3.85255
Beta-Alanine metabolism	ALDH3B1	1.56856
Beta-Alanine metabolism	AOC2	2.464
Fructose and mannose metabolism	RRM2	-1.10091
Glycerophospholipid metabolism	AGPAT4	1.11454
Glycosphingolipid biosynthesis - ganglioseries	CRYL1	1.19991
Histidine metabolism	AMDHD1	1.3187
Histidine metabolism	ALDH3B1	1.56856
N-Glycan biosynthesis	MGAT5B	-2.27335
Pentose and Glucuronate Interconversions	RRM2	-1.10091
Pentose phosphate pathway	H6PD	1.56229
Porphyrin metabolism	H6PD	1.56229
Purine metabolism	FHIT	1.0351
Purine metabolism	PDE10A	1.01738
Purine metabolism	NT5E	1.36691
Purine metabolism	AK7	1.3726
Purine metabolism	ADA	-1.00121
Purine metabolism	RRM2	-1.10091
Purine metabolism	NT5M	1.94938
Purine metabolism	ADSS1	2.27064
Purine metabolism	AK1	1.06423
Purine metabolism	PDE4B	-7.64803
Pyrimidine metabolism	NT5M	1.94938
Pyrimidine metabolism	RRM2	-1.10091
Pyrimidine metabolism	NT5E	1.36691
Tyrosine metabolism	AOC3	3.85255
Tyrosine metabolism	ALDH3B1	1.56856
Tyrosine metabolism	AOC2	2.464
Vitamin B12 (cyanocobalamin) metabolism	MGAT5B	-2.27335
Vitamin B12 (cyanocobalamin) metabolism	ALG14	-1.20987
Vitamin H (biotin) metabolism	AGPAT4	1.11454

## Sheet: G12D_V600E
Supplementary table 10C. Differentially expresed genes from significantly regulated metabolic pathways between RKO KRAS G12D and BRAF V600E.
Pathway	Gene Name	LogFC
Alkaloid biosynthesis II	PLA2G3	3.06307
Alkaloid biosynthesis II	PLA2G12A	-1.72052
Aminosugars metabolism	ACACB	-1.42292
Aminosugars metabolism	ACAT2	-2.04484
Aminosugars metabolism	ACSS1	6.01867
Arginine and Proline Metabolism	ALDH7A1	-1.65538
Arginine and Proline Metabolism	P4HA2	1.36385
Arginine and Proline Metabolism	GOT1	-1.73867
Aspartate and asparagine metabolism	ALDH7A1	-1.65538
Aspartate and asparagine metabolism	P4HA2	1.36385
Aspartate and asparagine metabolism	GOT1	-1.73867
Beta-Alanine metabolism	ALDH7A1	-1.65538
Beta-Alanine metabolism	ABAT	-1.22078
Beta-Alanine metabolism	ALDH3B1	1.34563
Blood Group Biosynthesis	PYGB	1.15146
Blood Group Biosynthesis	ENPP1	-1.99279
Blood Group Biosynthesis	PGM2L1	1.574
Blood Group Biosynthesis	HKDC1	-4.14065
Butanoate metabolism	HMGCS1	-1.70618
Butanoate metabolism	ABAT	-1.22078
Butanoate metabolism	ACAT2	-2.04484
Butanoate metabolism	ACSM3	1.89946
Butanoate metabolism	ALDH5A1	-1.15657
Butanoate metabolism	HADH	-1.0997
Butanoate metabolism	EHHADH	1.14047
Caffeine metabolism	NAT1	1.71956
Caffeine metabolism	MAN1A1	1.65143
Caffeine metabolism	NAT2	3.52017
Fructose and mannose metabolism	ALDOA	1.40769
Fructose and mannose metabolism	HKDC1	-4.14065
Fructose and mannose metabolism	PFKFB4	1.4398
Galactose metabolism	HKDC1	-4.14065
Glutathione Metabolism	OPLAH	1.40622
Glutathione Metabolism	GCLC	-1.13952
Glutathione Metabolism	TXNDC12	-1.1563
Glycerophospholipid metabolism	MBOAT1	-1.41554
Glycerophospholipid metabolism	LPCAT2	5.44713
Glycerophospholipid metabolism	LPCAT4	1.30108
Glycosphingolipid biosynthesis - lactoseries	ALDH7A1	-1.65538
Glycosphingolipid biosynthesis - neolactoseries	UPP1	2.25094
Glycosphingolipid biosynthesis - neolactoseries	RRM2	-1.04859
Glycosphingolipid biosynthesis - neolactoseries	TYMP	2.52288
Glycosphingolipid biosynthesis - neolactoseries	NME2	1.33035
Glycosphingolipid biosynthesis - neolactoseries	ENPP1	-1.99279
Glycosphingolipid biosynthesis - neolactoseries	NT5E	7.07196
Glycosphingolipid biosynthesis - neolactoseries	RRM1	-1.34012
Glycosphingolipid biosynthesis - neolactoseries	NT5C2	-1.35548
Glycosphingolipid biosynthesis - neolactoseries	NT5M	-1.13163
Histidine metabolism	ALDH7A1	-1.65538
Histidine metabolism	GOT1	-1.73867
Histidine metabolism	ALDH3B1	1.34563
Keratan sulfate degradation	OPLAH	1.40622
Keratan sulfate degradation	GCLC	-1.13952
Keratan sulfate degradation	TXNDC12	-1.1563
Methionine and cysteine metabolism	ABAT	-1.22078
Methionine and cysteine metabolism	ALDH7A1	-1.65538
N-Glycan biosynthesis	ALDH7A1	-1.65538
N-Glycan biosynthesis	MGAT4B	1.33535
N-Glycan biosynthesis	ACAT2	-2.04484
N-Glycan biosynthesis	MGAT4A	-1.59404
N-Glycan biosynthesis	MAN1A1	1.65143
Nitrogen metabolism	HMGCS1	-1.70618
Nitrogen metabolism	ABAT	-1.22078
Nitrogen metabolism	ACAT2	-2.04484
Nitrogen metabolism	ACSM3	1.89946
Pentose and Glucuronate Interconversions	DHDH	-2.39379
Pentose phosphate pathway	HMGCS1	-1.70618
Pentose phosphate pathway	ALDH7A1	-1.65538
Pentose phosphate pathway	ABAT	-1.22078
Pentose phosphate pathway	ACAT2	-2.04484
Phosphatidylinositol phosphate metabolism	ACACB	-1.42292
Phosphatidylinositol phosphate metabolism	ACAT2	-2.04484
Phosphatidylinositol phosphate metabolism	ACSS1	6.01867
Porphyrin metabolism	HKDC1	-4.14065
Propanoate metabolism	ABAT	-1.22078
Propanoate metabolism	ACAT2	-2.04484
Propanoate metabolism	ACACB	-1.42292
Propanoate metabolism	EHHADH	1.14047
Propanoate metabolism	ACSS1	6.01867
Purine metabolism	PDE4B	3.37168
Purine metabolism	ENPP1	-1.99279
Purine metabolism	NT5E	7.07196
Purine metabolism	ALDOA	1.40769
Purine metabolism	GMPR	-1.44187
Purine metabolism	AK8	1.96469
Purine metabolism	NME2	1.33035
Purine metabolism	NT5M	-1.13163
Purine metabolism	AMPD3	1.75453
Purine metabolism	RRM1	-1.34012
Purine metabolism	NT5C2	-1.35548
Purine metabolism	RRM2	-1.04859
Purine metabolism	PDE10A	5.55464
Purine metabolism	NPR2	1.05691
Purine metabolism	PKM	1.88478
Pyrimidine metabolism	UPP1	2.25094
Pyrimidine metabolism	RRM2	-1.04859
Pyrimidine metabolism	TYMP	2.52288
Pyrimidine metabolism	NME2	1.33035
Pyrimidine metabolism	ENPP1	-1.99279
Pyrimidine metabolism	NT5E	7.07196
Pyrimidine metabolism	RRM1	-1.34012
Pyrimidine metabolism	NT5C2	-1.35548
Pyrimidine metabolism	NT5M	-1.13163
Pyruvate Metabolism	FH	-1.13205
Pyruvate Metabolism	ACAT2	-2.04484
Pyruvate Metabolism	ACACB	-1.42292
Pyruvate Metabolism	ACSS1	6.01867
Starch and Sucrose Metabolism	ENPP1	-1.99279
Starch and Sucrose Metabolism	HKDC1	-4.14065
Tryptophan metabolism	ACAT2	-2.04484
Tryptophan metabolism	ALDH7A1	-1.65538
Tyrosine metabolism	ALDH3B1	1.34563
Tyrosine metabolism	GOT1	-1.73867
Valine, leucine and isoleucine degradation	HMGCS1	-1.70618
Valine, leucine and isoleucine degradation	ALDH7A1	-1.65538
Valine, leucine and isoleucine degradation	ABAT	-1.22078
Valine, leucine and isoleucine degradation	ACAT2	-2.04484
Valine, leucine and isoleucine degradation	HIBADH	-1.67452
Valine, leucine and isoleucine degradation	HADH	-1.0997
Valine, leucine and isoleucine degradation	EHHADH	1.14047
Vitamin B1 (thiamin) metabolism	RRM2	-1.04859
Vitamin B1 (thiamin) metabolism	PDE4B	3.37168
Vitamin B1 (thiamin) metabolism	AMPD3	1.75453
Vitamin B1 (thiamin) metabolism	AK8	1.96469
Vitamin B1 (thiamin) metabolism	PDE10A	5.55464
Vitamin B1 (thiamin) metabolism	NME2	1.33035
Vitamin B1 (thiamin) metabolism	ENPP1	-1.99279
Vitamin B1 (thiamin) metabolism	NT5E	7.07196
Vitamin B1 (thiamin) metabolism	RRM1	-1.34012
Vitamin B1 (thiamin) metabolism	NT5C2	-1.35548
Vitamin B1 (thiamin) metabolism	NT5M	-1.13163
Vitamin B1 (thiamin) metabolism	PKM	1.88478
Vitamin D3 (cholecalciferol) metabolism	PLA2G3	3.06307
Vitamin D3 (cholecalciferol) metabolism	GPD2	-1.00759
Vitamin D3 (cholecalciferol) metabolism	MBOAT1	-1.41554
Vitamin D3 (cholecalciferol) metabolism	LPCAT2	5.44713
Vitamin D3 (cholecalciferol) metabolism	PLA2G12A	-1.72052
Vitamin D3 (cholecalciferol) metabolism	LPCAT4	1.30108
Vitamin E metabolism	PFKFB4	1.4398
Vitamin E metabolism	ALDOA	1.40769
Vitamin E metabolism	PMM1	1.03605
Vitamin E metabolism	HKDC1	-4.14065

## Sheet: G12D_WT
Supplementary table 10D. Differentially expresed genes from significantly regulated metabolic pathways between RKO KRAS G12D and BRAF WT.
Pathway	Gene Name	LogFC
1- and 2-Methylnaphthalene degradation	ACAT2	-1.69881
1- and 2-Methylnaphthalene degradation	ALDH7A1	-1.09528
Arachidonic acid metabolism	GPX3	1.95414
Arginine and Proline Metabolism	ALDH7A1	-1.09528
Beta-Alanine metabolism	ALDH3B1	1.41234
Beta-Alanine metabolism	ALDH7A1	-1.09528
Biopterin metabolism	TIGAR	1.13659
Biopterin metabolism	PMM1	1.07849
Caffeine metabolism	NAT2	3.55096
Fructose and mannose metabolism	ACAT2	-1.69881
Fructose and mannose metabolism	ACACB	-1.22029
Galactose metabolism	GAA	1.38638
Glutathione Metabolism	GPX3	1.95414
Glutathione Metabolism	OPLAH	1.12069
Glycerophospholipid metabolism	MBOAT1	-1.20719
Glycerophospholipid metabolism	LPCAT3	-1.20124
Glycosphingolipid biosynthesis - globoseries	ACAT2	-1.69881
Glycosphingolipid biosynthesis - globoseries	ACACB	-1.22029
Histidine metabolism	ALDH3B1	1.41234
Histidine metabolism	ALDH7A1	-1.09528
Keratan sulfate biosynthesis	GPX3	1.95414
Keratan sulfate biosynthesis	OPLAH	1.12069
Limonene and pinene degradation	ACAT2	-1.69881
Methionine and cysteine metabolism	GPX3	1.95414
Pentose phosphate pathway	ACAT2	-1.69881
Pentose phosphate pathway	H6PD	1.81377
Propanoate metabolism	LDHA	-1.04541
Purine metabolism	ALDH7A1	-1.09528
Purine metabolism	ADCY7	1.09892
Purine metabolism	NT5E	2.23722
Purine metabolism	AK7	-1.39055
Purine metabolism	DCK	-1.24964
Purine metabolism	PDE4A	1.30519
Purine metabolism	RRM2	-2.20054
Purine metabolism	ENPP1	1.05165
Purine metabolism	ADSS1	1.51579
Purine metabolism	PDE5A	-1.03447
Purine metabolism	RRM1	-1.68513
Pyrimidine metabolism	DCK	-1.24964
Pyrimidine metabolism	ENPP1	1.05165
Pyrimidine metabolism	RRM1	-1.68513
Pyrimidine metabolism	RRM2	-2.20054
Pyrimidine metabolism	NT5E	2.23722
Pyruvate Metabolism	AK7	-1.39055
Pyruvate Metabolism	DCK	-1.24964
Pyruvate Metabolism	ENPP1	1.05165
Pyruvate Metabolism	PDE4A	1.30519
Pyruvate Metabolism	RRM1	-1.68513
Pyruvate Metabolism	RRM2	-2.20054
Pyruvate Metabolism	NT5E	2.23722
Squalene and cholesterol biosynthesis	DCK	-1.24964
Squalene and cholesterol biosynthesis	ENPP1	1.05165
Squalene and cholesterol biosynthesis	RRM1	-1.68513
Squalene and cholesterol biosynthesis	RRM2	-2.20054
Squalene and cholesterol biosynthesis	NT5E	2.23722
Starch and Sucrose Metabolism	GAA	1.38638
Tryptophan metabolism	ALDH7A1	-1.09528
Tyrosine metabolism	ALDH3B1	1.41234
Ubiquinone Biosynthesis	GAA	1.38638
Urea cycle/amino group metabolism	ENPP1	1.05165
Urea cycle/amino group metabolism	GAA	1.38638
Valine, leucine and isoleucine degradation	ALDH7A1	-1.09528
Vitamin B9 (folate) metabolism	H6PD	1.81377
Vitamin E metabolism	LPCAT3	-1.20124
Vitamin E metabolism	MBOAT1	-1.20719

## Sheet: G12V_V600E
Supplementary table 10E. Differentially expresed genes from significantly regulated metabolic pathways between RKO KRAS G12V and BRAF V600E.
Pathway	Gene Name	LogFC
Alanine and Aspartate Metabolism	LCT	3.10121
Alanine and Aspartate Metabolism	HK2	1.00043
Alanine and Aspartate Metabolism	GALM	-1.02618
Alanine and Aspartate Metabolism	HKDC1	-5.06064
Alkaloid biosynthesis II	PFKFB4	1.51712
Alkaloid biosynthesis II	TKFC	-1.00787
Alkaloid biosynthesis II	HK2	1.00043
Alkaloid biosynthesis II	PFKFB2	-1.19248
Alkaloid biosynthesis II	HKDC1	-5.06064
Arginine and Proline Metabolism	ALDH7A1	-1.05305
Arginine and Proline Metabolism	GOT1	-1.88277
Beta-Alanine metabolism	ALDH7A1	-1.05305
Butanoate metabolism	ALDH5A1	-1.08726
Butanoate metabolism	EHHADH	1.04714
Butanoate metabolism	ACSM3	1.90699
Caffeine metabolism	NAT1	1.57451
Caffeine metabolism	MGAT5B	-1.8473
Caffeine metabolism	MAN1A1	1.66777
Carbon fixation	GOT1	-1.88277
Carbon fixation	ALDH7A1	-1.05305
Chondroitin sulfate degradation	ALDH7A1	-1.05305
Fructose and mannose metabolism	PFKFB4	1.51712
Fructose and mannose metabolism	HK2	1.00043
Fructose and mannose metabolism	PFKFB2	-1.19248
Fructose and mannose metabolism	HKDC1	-5.06064
Galactose metabolism	LCT	3.10121
Galactose metabolism	HK2	1.00043
Galactose metabolism	GALM	-1.02618
Galactose metabolism	HKDC1	-5.06064
Glutathione Metabolism	GCLC	-1.0399
Glutathione Metabolism	CHAC1	-1.85649
Glycerophospholipid metabolism	LPCAT4	1.13099
Histidine metabolism	ALDH7A1	-1.05305
Keratan sulfate biosynthesis	ACSM3	1.90699
N-Glycan Degradation	ENPP1	-3.42189
N-Glycan Degradation	PGM2L1	1.59609
N-Glycan Degradation	HK2	1.00043
N-Glycan Degradation	HKDC1	-5.06064
N-Glycan biosynthesis	MGAT4B	1.18719
N-Glycan biosynthesis	MGAT4A	-1.19903
N-Glycan biosynthesis	MAN1A1	1.66777
N-Glycan biosynthesis	MGAT5B	-1.8473
Propanoate metabolism	EHHADH	1.04714
Propanoate metabolism	ACSS1	5.89841
Proteoglycan biosynthesis	LPCAT4	1.13099
Purine metabolism	PDE4D	-2.65476
Purine metabolism	ENPP1	-3.42189
Purine metabolism	NT5E	5.60546
Purine metabolism	AK8	2.25164
Purine metabolism	AMPD3	2.26537
Purine metabolism	NT5C2	-1.51673
Purine metabolism	AK7	2.00461
Purine metabolism	ALDH7A1	-1.05305
Purine metabolism	PDE10A	5.8449
Purine metabolism	PKM	2.04635
Pyrimidine metabolism	CHAC1	-1.85649
Pyrimidine metabolism	TYMP	1.91249
Pyrimidine metabolism	GSTO1	1.07749
Pyrimidine metabolism	GSTK1	1.00589
Pyrimidine metabolism	GCLC	-1.0399
Pyrimidine metabolism	ENPP1	-3.42189
Pyrimidine metabolism	NT5E	5.60546
Pyrimidine metabolism	NT5C2	-1.51673
Pyrimidine metabolism	TXNDC12	-1.32073
Selenoamino acid metabolism	UPP1	2.00568
Selenoamino acid metabolism	TYMP	1.91249
Selenoamino acid metabolism	ENPP1	-3.42189
Selenoamino acid metabolism	NT5E	5.60546
Selenoamino acid metabolism	NT5C2	-1.51673
Sialic acid metabolism	ACSS1	5.89841
Starch and Sucrose Metabolism	HK2	1.00043
Starch and Sucrose Metabolism	HKDC1	-5.06064
Tryptophan metabolism	PDE4D	-2.65476
Tryptophan metabolism	ENPP1	-3.42189
Tryptophan metabolism	NT5E	5.60546
Tryptophan metabolism	KYNU	2.90708
Tryptophan metabolism	AK8	2.25164
Tryptophan metabolism	AOX1	3.09422
Tryptophan metabolism	AMPD3	2.26537
Tryptophan metabolism	NT5C2	-1.51673
Tryptophan metabolism	AK7	2.00461
Tryptophan metabolism	ALDH7A1	-1.05305
Tryptophan metabolism	PDE10A	5.8449
Tryptophan metabolism	PKM	2.04635
Tyrosine metabolism	KYNU	2.90708
Tyrosine metabolism	ALDH7A1	-1.05305
Tyrosine metabolism	GOT1	-1.88277
Tyrosine metabolism	AOX1	3.09422
Urea cycle/amino group metabolism	GOT1	-1.88277
Valine, leucine and isoleucine degradation	ALDH7A1	-1.05305
Valine, leucine and isoleucine degradation	HIBADH	-1.49427
Valine, leucine and isoleucine degradation	AOX1	3.09422
Valine, leucine and isoleucine degradation	EHHADH	1.04714

## Sheet: G12V_WT
Supplementary table 10F. Differentially expresed genes from significantly regulated metabolic pathways between RKO KRAS G12V and BRAF WT.
Pathway	Gene Name	LogFC
Aminosugars metabolism	ALDH1A3	2.00641
Androgen and estrogen biosynthesis and metabolism	AGPAT4	1.04103
Beta-Alanine metabolism	ALDH1A3	2.00641
Beta-Alanine metabolism	ABAT	1.68568
Bile acid biosynthesis	HK2	1.0151
Butanoate metabolism	ABAT	1.68568
Fructose and mannose metabolism	HK2	1.0151
Galactose metabolism	HK2	1.0151
Galactose metabolism	GAA	1.0511
Glycerophospholipid metabolism	AGPAT4	1.04103
Histidine metabolism	AMDHD1	1.25927
Histidine metabolism	ALDH1A3	2.00641
Keratan sulfate biosynthesis	ALDH1A3	2.00641
Keratan sulfate biosynthesis	ABAT	1.68568
N-Glycan biosynthesis	HK2	1.0151
Nucleotide Sugar Metabolism	HK2	1.0151
Pentose phosphate pathway	H6PD	1.66697
Porphyrin metabolism	ABAT	1.68568
Propanoate metabolism	ABAT	1.68568
Propanoate metabolism	LDHA	-1.08039
Purine metabolism	RRM2	-1.19557
Purine metabolism	PDE4D	-1.11769
Purine metabolism	NT5M	1.33043
Purine metabolism	ADSS1	1.55426
Purine metabolism	AK1	1.10951
Pyrimidine metabolism	NT5M	1.33043
Pyrimidine metabolism	RRM2	-1.19557
Pyruvate Metabolism	NT5M	1.33043
Pyruvate Metabolism	RRM2	-1.19557
R Group Synthesis	NT5M	1.33043
R Group Synthesis	AK1	1.10951
R Group Synthesis	RRM2	-1.19557
R Group Synthesis	PDE4D	-1.11769
Starch and Sucrose Metabolism	HK2	1.0151
Starch and Sucrose Metabolism	GAA	1.0511
Tyrosine metabolism	AOC3	3.8059
Tyrosine metabolism	ABAT	1.68568
Tyrosine metabolism	ALDH1A3	2.00641
Urea cycle/amino group metabolism	AOC3	3.8059
Urea cycle/amino group metabolism	ALDH1A3	2.00641
Valine, leucine and isoleucine degradation	ABAT	1.68568

## Sheet: G13D_V600E
Supplementary table 10G. Differentially expresed genes from significantly regulated metabolic pathways between RKO KRAS G13D and BRAF V600E.
Pathway	Gene Name	LogFC
Alanine and Aspartate Metabolism	GOT1	-2.08396
Arginine and Proline Metabolism	ALDH7A1	-1.30149
Arginine and Proline Metabolism	P4HA2	1.59204
Arginine and Proline Metabolism	GOT1	-2.08396
Aspartate and asparagine metabolism	PRPS1	-1.09005
Aspartate and asparagine metabolism	ALDOA	1.42471
Beta-Alanine metabolism	ALDH7A1	-1.30149
Butanoate metabolism	ACSM3	2.4936
Butanoate metabolism	ALDH5A1	-1.32325
Butanoate metabolism	HADH	-1.07099
Butanoate metabolism	EHHADH	1.27404
Butanoate metabolism	ACSS1	6.19459
Fatty acid oxidation, peroxisome	MBOAT2	1.10453
Fatty acid oxidation, peroxisome	LPCAT4	1.09219
Galactose metabolism	HKDC1	-5.70179
Glutathione Metabolism	UPP1	1.88353
Glutathione Metabolism	OPLAH	1.44671
Glutathione Metabolism	TYMP	1.58911
Glutathione Metabolism	GCLC	-1.14155
Glutathione Metabolism	ENPP1	-1.86508
Glutathione Metabolism	NT5E	5.53367
Glutathione Metabolism	NT5C2	-1.31293
Glutathione Metabolism	UCKL1	1.37816
Glycosphingolipid biosynthesis - globoseries	ALDOA	1.42471
Glycosphingolipid biosynthesis - globoseries	HKDC1	-5.70179
Histidine metabolism	PDE4B	2.4339
Histidine metabolism	PDE4D	-2.63756
Histidine metabolism	ENPP1	-1.86508
Histidine metabolism	NT5E	5.53367
Histidine metabolism	AK8	2.46308
Histidine metabolism	ITPA	1.09606
Histidine metabolism	AMPD3	2.27639
Histidine metabolism	NT5C2	-1.31293
Histidine metabolism	AK7	2.07454
Histidine metabolism	PRPS1	-1.09005
Histidine metabolism	ALDH7A1	-1.30149
Histidine metabolism	PDE10A	5.74319
Histidine metabolism	PKM	1.724
N-Glycan Degradation	PYGB	1.03988
N-Glycan Degradation	ENPP1	-1.86508
N-Glycan Degradation	PGM2L1	1.72592
N-Glycan Degradation	HKDC1	-5.70179
Omega-6 fatty acid metabolism	ACSM3	2.4936
Pentose phosphate pathway	PRPS1	-1.09005
Propanoate metabolism	EHHADH	1.27404
Propanoate metabolism	ACSS1	6.19459
Propanoate metabolism	HKDC1	-5.70179
Purine metabolism	PDE4B	2.4339
Purine metabolism	PDE4D	-2.63756
Purine metabolism	ENPP1	-1.86508
Purine metabolism	NT5E	5.53367
Purine metabolism	AK8	2.46308
Purine metabolism	ITPA	1.09606
Purine metabolism	AMPD3	2.27639
Purine metabolism	NT5C2	-1.31293
Purine metabolism	AK7	2.07454
Purine metabolism	PRPS1	-1.09005
Purine metabolism	ALDH7A1	-1.30149
Purine metabolism	PDE10A	5.74319
Purine metabolism	ADSS1	-2.31452
Purine metabolism	PKM	1.724
Pyrimidine metabolism	OPLAH	1.44671
Pyrimidine metabolism	GSTA4	-1.00695
Pyrimidine metabolism	GSTO1	1.05911
Pyrimidine metabolism	GCLC	-1.14155
Pyrimidine metabolism	ENPP1	-1.86508
Pyrimidine metabolism	NT5E	5.53367
Pyrimidine metabolism	NT5C2	-1.31293
Pyrimidine metabolism	UCKL1	1.37816
Pyrimidine metabolism	TXNDC12	-1.45148
Tryptophan metabolism	ALDH7A1	-1.30149
Tyrosine metabolism	GOT1	-2.08396
Urea cycle/amino group metabolism	GOT1	-2.08396
Valine, leucine and isoleucine degradation	ALDH7A1	-1.30149
Valine, leucine and isoleucine degradation	HIBADH	-1.38889
Valine, leucine and isoleucine degradation	HADH	-1.07099
Valine, leucine and isoleucine degradation	EHHADH	1.27404
Vitamin B12 (cyanocobalamin) metabolism	ALDH7A1	-1.30149
Vitamin D3 (cholecalciferol) metabolism	MGAT4B	1.18986
Vitamin D3 (cholecalciferol) metabolism	MGAT4A	-1.2071
Vitamin D3 (cholecalciferol) metabolism	MAN1A1	1.52004
Vitamin D3 (cholecalciferol) metabolism	MAN1B1	1.04966

## Sheet: G13D_WT
Supplementary table 10H. Differentially expresed genes from significantly regulated metabolic pathways between RKO KRAS G13D and BRAF WT.
Pathway	Gene Name	LogFC
Arginine and Proline Metabolism	ACAT2	-1.06997
Beta-Alanine metabolism	ENPP1	1.18837
Butanoate metabolism	ACSM3	1.10946
Caffeine metabolism	ACAT2	-1.06997
Caffeine metabolism	ACSM3	1.10946
Chondroitin sulfate degradation	ACAT2	-1.06997
CoA Catabolism	MGAT5B	-2.73831
Galactose metabolism	GAA	1.13278
Glutathione Metabolism	OPLAH	1.14413
Glycerophospholipid metabolism	AK1	1.34918
Glycerophospholipid metabolism	PDE10A	1.12989
Glycerophospholipid metabolism	RRM1	-1.17494
Glycerophospholipid metabolism	DCK	-1.22397
Glycerophospholipid metabolism	RRM2	-1.81514
Glycerophospholipid metabolism	AK8	1.23696
Glycerophospholipid metabolism	PDE4D	-1.06581
Glycerophospholipid metabolism	ENPP1	1.18837
Glycine, serine, alanine and threonine metabolism	ACACB	-1.03189
Glycine, serine, alanine and threonine metabolism	ACAT2	-1.06997
Hyaluronan Metabolism	ACACB	-1.03189
Hyaluronan Metabolism	ACAT2	-1.06997
N-Glycan biosynthesis	MGAT5B	-2.73831
Pentose phosphate pathway	H6PD	1.60726
Polyunsaturated fatty acid biosynthesis	OPLAH	1.14413
Propanoate metabolism	LDHA	-1.39659
Purine metabolism	AK1	1.34918
Purine metabolism	PDE10A	1.12989
Purine metabolism	RRM1	-1.17494
Purine metabolism	ADCY7	1.0148
Purine metabolism	DCK	-1.22397
Purine metabolism	RRM2	-1.81514
Purine metabolism	AK8	1.23696
Purine metabolism	PDE4D	-1.06581
Purine metabolism	ENPP1	1.18837
Pyrimidine metabolism	RRM1	-1.17494
Pyrimidine metabolism	ENPP1	1.18837
Pyrimidine metabolism	DCK	-1.22397
Pyrimidine metabolism	RRM2	-1.81514
Squalene and cholesterol biosynthesis	RRM1	-1.17494
Squalene and cholesterol biosynthesis	ENPP1	1.18837
Squalene and cholesterol biosynthesis	DCK	-1.22397
Squalene and cholesterol biosynthesis	RRM2	-1.81514
Starch and Sucrose Metabolism	GAA	1.13278
Tyrosine metabolism	CDS1	-1.57306

## Sheet: HCT116 V600E_G13D
Supplementary table 10I. Differentially expresed genes from significantly regulated metabolic pathways between HCT116 BRAF V600E and KRAS G13D.
Pathway	Gene Name	LogFC
Alanine and Aspartate Metabolism	GOT1	-2.08396
Arginine and Proline Metabolism	ALDH7A1	-1.30149
Arginine and Proline Metabolism	P4HA2	1.59204
Arginine and Proline Metabolism	GOT1	-2.08396
Aspartate and asparagine metabolism	PRPS1	-1.09005
Aspartate and asparagine metabolism	ALDOA	1.42471
Beta-Alanine metabolism	ALDH7A1	-1.30149
Butanoate metabolism	ACSM3	2.4936
Butanoate metabolism	ALDH5A1	-1.32325
Butanoate metabolism	HADH	-1.07099
Butanoate metabolism	EHHADH	1.27404
Butanoate metabolism	ACSS1	6.19459
Fatty acid oxidation, peroxisome	MBOAT2	1.10453
Fatty acid oxidation, peroxisome	LPCAT4	1.09219
Galactose metabolism	HKDC1	-5.70179
Glutathione Metabolism	UPP1	1.88353
Glutathione Metabolism	OPLAH	1.44671
Glutathione Metabolism	TYMP	1.58911
Glutathione Metabolism	GCLC	-1.14155
Glutathione Metabolism	ENPP1	-1.86508
Glutathione Metabolism	NT5E	5.53367
Glutathione Metabolism	NT5C2	-1.31293
Glutathione Metabolism	UCKL1	1.37816
Glycosphingolipid biosynthesis - globoseries	ALDOA	1.42471
Glycosphingolipid biosynthesis - globoseries	HKDC1	-5.70179
Histidine metabolism	PDE4B	2.4339
Histidine metabolism	PDE4D	-2.63756
Histidine metabolism	ENPP1	-1.86508
Histidine metabolism	NT5E	5.53367
Histidine metabolism	AK8	2.46308
Histidine metabolism	ITPA	1.09606
Histidine metabolism	AMPD3	2.27639
Histidine metabolism	NT5C2	-1.31293
Histidine metabolism	AK7	2.07454
Histidine metabolism	PRPS1	-1.09005
Histidine metabolism	ALDH7A1	-1.30149
Histidine metabolism	PDE10A	5.74319
Histidine metabolism	PKM	1.724
N-Glycan Degradation	PYGB	1.03988
N-Glycan Degradation	ENPP1	-1.86508
N-Glycan Degradation	PGM2L1	1.72592
N-Glycan Degradation	HKDC1	-5.70179
Omega-6 fatty acid metabolism	ACSM3	2.4936
Pentose phosphate pathway	PRPS1	-1.09005
Propanoate metabolism	EHHADH	1.27404
Propanoate metabolism	ACSS1	6.19459
Propanoate metabolism	HKDC1	-5.70179
Purine metabolism	PDE4B	2.4339
Purine metabolism	PDE4D	-2.63756
Purine metabolism	ENPP1	-1.86508
Purine metabolism	NT5E	5.53367
Purine metabolism	AK8	2.46308
Purine metabolism	ITPA	1.09606
Purine metabolism	AMPD3	2.27639
Purine metabolism	NT5C2	-1.31293
Purine metabolism	AK7	2.07454
Purine metabolism	PRPS1	-1.09005
Purine metabolism	ALDH7A1	-1.30149
Purine metabolism	PDE10A	5.74319
Purine metabolism	ADSS1	-2.31452
Purine metabolism	PKM	1.724
Pyrimidine metabolism	OPLAH	1.44671
Pyrimidine metabolism	GSTA4	-1.00695
Pyrimidine metabolism	GSTO1	1.05911
Pyrimidine metabolism	GCLC	-1.14155
Pyrimidine metabolism	ENPP1	-1.86508
Pyrimidine metabolism	NT5E	5.53367
Pyrimidine metabolism	NT5C2	-1.31293
Pyrimidine metabolism	UCKL1	1.37816
Pyrimidine metabolism	TXNDC12	-1.45148
Tryptophan metabolism	ALDH7A1	-1.30149
Tyrosine metabolism	GOT1	-2.08396
Urea cycle/amino group metabolism	GOT1	-2.08396
Valine, leucine and isoleucine degradation	ALDH7A1	-1.30149
Valine, leucine and isoleucine degradation	HIBADH	-1.38889
Valine, leucine and isoleucine degradation	HADH	-1.07099
Valine, leucine and isoleucine degradation	EHHADH	1.27404
Vitamin B12 (cyanocobalamin) metabolism	ALDH7A1	-1.30149
Vitamin D3 (cholecalciferol) metabolism	MGAT4B	1.18986
Vitamin D3 (cholecalciferol) metabolism	MGAT4A	-1.2071
Vitamin D3 (cholecalciferol) metabolism	MAN1A1	1.52004
Vitamin D3 (cholecalciferol) metabolism	MAN1B1	1.04966

## Sheet: HCT116 V600E_WT
Supplementary table 10J. Differentially expresed genes from significantly regulated metabolic pathways between HCT116 BRAF V600E and KRAS WT.
Pathway	Gene Name	LogFC
Arginine and Proline Metabolism	ARG2	-1.2361
Arginine and Proline Metabolism	P4HA1	1.24253
Arginine and Proline Metabolism	ALDH4A1	-1.30178
Beta-Alanine metabolism	ABAT	-1.01282
Butanoate metabolism	BDH2	-1.08747
Butanoate metabolism	ABAT	-1.01282
Fructose and mannose metabolism	HKDC1	-2.48127
Galactose metabolism	HKDC1	-2.48127
Glutamate metabolism	NT5E	2.15618
Glutamate metabolism	PDE4D	-1.15252
Glutamate metabolism	PDE4B	-3.58655
Glutathione Metabolism	CHAC1	2.89788
Glutathione Metabolism	GSTP1	-1.2047
Glutathione Metabolism	MGST1	-1.14667
Propanoate metabolism	ABAT	-1.01282
Purine metabolism	NT5E	2.15618
Pyrimidine metabolism	NT5E	2.15618
Starch and Sucrose Metabolism	HKDC1	-2.48127
Tyrosine metabolism	CAT	-1.63951
Tyrosine metabolism	ALDH3B1	-1.43786
Tyrosine metabolism	HPD	-4.86994
Urea cycle/amino group metabolism	HPD	-4.86994
Valine, leucine and isoleucine degradation	ABAT	-1.01282
Vitamin B5 - CoA biosynthesis from pantothenate	NT5E	2.15618
Vitamin B9 (folate) metabolism	HKDC1	-2.48127
